# Supplementary material
Source: PubMed Central journal article supplement (PMC3427113)
Supplement: 1203218109_pnas.201203218SI.pdf [file 1203218109_pnas.201203218SI.pdf]

# Supporting Information

Lee et al. 10.1073/pnas.1203218109

## SI Materials and Methods

**Oral Glucose Tolerance Test.** For the oral glucose tolerance tests, 16-h fasted mice were challenged with a 1.5-mg glucose per gram body weight glucose load. Blood glucose was measured from tail-vein blood collected at the designated times, using an automatic glucose monitor (OneTouch; LifeScan).

**Cell Culture and Primary Hepatocyte Isolation.** Alpha mouse liver (AML) 12 hepatocytes (ATCC) were grown at 37 °C in DMEM-F12 (Gibco); 1× insulin, transferrin, and selenium (Invitrogen); 100 nM dexamethasone; and 10% (vol/vol) FBS. Primary mouse hepatocytes were isolated by the two-step collagenase perfusion method from the livers of male C57BL/6 and C3H/HeJ mice (7 wk old) as previously described (1). Hepatocytes were plated on six-well dishes at  $1.0 \times 10^6$  cells per well and incubated for 12 h in DMEM containing 10% (vol/vol) FBS to allow cells to attach. Cell counts and viability (Adam cell counter; Digital Bio) were confirmed before use; viability was routinely >80%. After attachment, cells were infected with various adenoviruses, indicated in Figs. 2–4 and Figs. S4 and S5.

**Western Blot.** For protein preparation from liver tissues, mouse livers (50 mg) were placed in a glass homogenizer containing 0.6 mL Pro-Prep Protein Extraction Solution (Intron Biotechnology). Completely homogenized tissues were incubated on ice for 20 min and centrifuged at  $13,400 \times g$  at 4 °C for 10 min. Tissue or cell lysates were separated by electrophoresis on SDS/PAGE gels. Gels were transferred onto nitrocellulose membranes and the blots were incubated with blocking buffer [5% (wt/vol) nonfat dried milk in TBST] before incubation with antibodies. Primary antibodies used for blotting were anti-peroxisome proliferator-activated receptor  $\gamma$  (anti-PPAR $\gamma$ ), anti- $\beta$ -actin, anti- $\alpha$ -tubulin, anti-FLAG (Santa Cruz), anti-aP2/422 (2), and anti-adipose differentiation-related protein (anti-ADRP) (Abcam). A mouse monoclonal antibody against monoacylglycerol *O*-transferase 1 (MGAT1) was generated using a synthetic peptide (residues 228–240, GENDLYKQINNPK) of murine MGAT1 by AbClon. Bands were detected with anti-rabbit or anti-mouse IgG conjugated with horseradish peroxidase (Pierce), using the ECL-PLUS detection system (Amersham).

**RNA Isolation and PCR Analysis.** Total RNA was isolated using TRIzol reagent (Invitrogen) according to the manufacturer's instructions. First-strand cDNA synthesis from 5  $\mu$ g total RNA was performed using SuperScript II reverse transcriptase (Invitrogen) primed by random hexamer primers. Real-time qPCR was performed using SYBR Green Master mix (Applied Biosystems) in a total volume of 20  $\mu$ L with a Step One instrument (Applied Biosystems). A standard curve was used to calculate mRNA level relative to that of a control gene, RPLP0. The primer sequences used in real-time qPCR are as follows: PPAR $\gamma$ 2, 5'-CTCTGGGAGATTCTCCTGTTGA-3', 5'-GGTG-GGCCAGAATGGCATCT-3'; aP2/422, 5'-TCTCCAGTGAA-ACTTCGAT-3', 5'-TTACGCTGATGATCATGTTG-3'; FSP27, 5'-TCCAGGACATCTTGAACCTT-3', 5'-GGCTTGCAAGTAT-TCTTCTGT-3'; Cd36, 5'-TGCACCACATATACCAAAA-3', 5'-TTGTAACCCACAAGAGTTC-3'; SREBP1a, 5'-AGATGTG-CGAACTGGACACA-3', 5'-CATCTTTAAAGCAGCGGGTG-3'; SREBP1c, 5'-GGAGCCATGGATTGCACATT-3', 5'-CATCTT-TAAAGCAGCGGGTG-3'; ACC $\alpha$ , 5'-GAGGAAGTTGGCTA-TCCAGT-3', 5'-GTTGAACCTGTCTGAAGAGG-3'; FAS, 5'-AAGCCGTTGGGAGTGAAAGT-3', 5'-CAATCTGGATGGC-

AGTGAGG-3'; ACL, 5'-ACATTGCAGACCTGGATGCCA-3', 5'-TTAAGGAGGAAGTTGGCAGT-3'; AGPAT2, 5'-AGCGG-ACAGAAGAACTGGA-3', 5'-TGAAGTAGACACCCCCAA-GG-3'; MGAT1, 5'-CTGGTCTGTTTCCCGTTGT-3', 5'-TGG-GTCAAGGCCATCTTAAC-3'; DGAT1, 5'-TTCCGCCTCTG-GGCATT-3', 5'-AGAATCGGCCACAATCCA-3'; and Rplp0, 5'-GCAGGTGTTTGACAACGGCAG-3', 5'-GATGATGGAGT-GTGGCACCGA-3'. Also, data in Fig. S1C were carried out by RT-PCR with agarose gel electrophoresis, using the following primers: PPAR $\gamma$ 1, 5'-ACAGGACTGTGTGACAGACA-3', 5'-GCTGGAGAAATCAACTGTGG-3'; PPAR $\gamma$ 2, 5-TATGGGTG-AAACTCTGGGAG-3', 5'-GCTGGAGAAATCAACTGTGG-3'; and GAPDH, 5'-ACCACAGTCCATGCCATCAC-3', 5'-TCC-ACCACCCTGTTGCTGTA-3'.

**Gene Silencing with siRNA.** The siRNA was designed to target PPAR $\gamma$  mRNA. Its target sequence was 5'-GAAGUUCAUUGCACUG-GAATT-3' (siPPAR $\gamma$ ). The scrambled siRNA was purchased from GenePharma. They were introduced into primary mouse hep-atocytes using Lipofectamine RNAiMAX (Invitrogen).

**Preparation of Recombinant Adenovirus.** Murine PPAR $\gamma$ 2 and MGAT1 cDNAs were cloned into pcDNA3.0 vector or FLAG-tagged pcDNA3, respectively. Recombinant adenoviruses expressing PPAR $\gamma$ 2 and MGAT1-FLAG were prepared as follows. Briefly, we first constructed an E1 shuttle vector expressing murine PPAR $\gamma$ 2 and MGAT1. The newly constructed E1 shuttle vector was linearized with PmeI digestion. The linearized shuttle vector was then cotransformed into *Escherichia coli* BJ5183 along with pAdEasy1 vector. All viruses were propagated in 293 cells and purified by CsCl density purification, dissolved in 1× HBSS (Invitrogen), and stored at –80 °C. Viral particle numbers were calculated from measurements of absorbance at 260 nm. The multiplicity of infection was calculated from viral particle numbers. Recombinant adenovirus containing the GFP gene was used as a control. Similarly, ad-shRNA for MGAT1 was constructed as previously described (3). On the basis of the design principles for shRNA construction, we selected RNAi target sites that efficiently suppressed the MGAT1 expression among three RNAi samples tested: sh-MGAT1-a, 5'-UUUCACCCU-CAUGGAAUAUUCGUGCCU-3'; and sh-MGAT1-b, 5'-CA-AGACGCAAUGUAUGAUUCAUUGGA-3'. To prepare re-combinant adenovirus expressing shRNA against MGAT1, annealed shRNA DNA nucleotides were cloned into pBS-U6 and subcloned into the AdTrack( $\Delta$ CMV) vector, using an adenoviral vector system. The AdTrack( $\Delta$ CMV)-U6-shMGAT1 vector and the adenovirus vector AdEasy were linearized by restriction en-zyme. The linearized AdTrack( $\Delta$ CMV)-U6-shMGAT1 was co-transformed into *E. coli* BJ5183 with AdEasy for homologous recombination. The complete Ad-shMGAT1 virus was recovered by transfection of PacI-digested DNA into human embryonic kidney (HEK) 293 cells by a lipofectamine-based procedure. Large-scale purification of all adenoviruses was performed by ultracentrifugation with cesium chloride according to standard techniques. Ad-US control RNAi was used as a control (3).

**Histological Analysis.** Livers and white adipose tissue (WAT) were removed and fixed with 10% (vol/vol) formalin and embedded in paraffin. Tissue sections were stained with H&E.

**Triglyceride (TG) Assay in the Liver and Cultured Hepatocytes.** Liver extracts were prepared by homogenization in chloroform:meth-

anol (2:1). TG level was measured using TG assay reagents (Thermo Scientific).

**Electrophoretic Mobility Shift Assays (EMSA).** Nuclear extracts from C57BL/6 (B6) and C3H mice fed with a chow diet (CD) or a high-fat diet (HFD) were prepared as described in ref. 4. As a control, we used nuclear extract from fully differentiated 3T3-L1 cells. In another experiment, in vitro-translated PPAR $\gamma$ 2 and RXR $\alpha$  protein was used. RXR $\alpha$  and PPAR $\gamma$ 2 expression vectors were constructed by insertion of cDNAs into pcDNA3.0 (Invitrogen) and used to synthesize RXR $\alpha$  and PPAR $\gamma$ 2 protein following the TNT T7 quick master mix (Promega). EMSAs were performed using in vitro-transcribed RXR $\alpha$  and PPAR $\gamma$ 2 protein. Double-stranded probes were labeled with [ $\gamma$ -<sup>32</sup>P]ATP, using T4 polynucleotide kinase. The binding reactions were previously described (4). For supershift assay, we added 1  $\mu$ g of anti-PPAR $\gamma$  antibody (Santa Cruz). Protein-DNA complexes were resolved from the free probe by electrophoresis at 4 °C on a 4% (wt/vol) polyacrylamide gel in 0.25  $\times$  TBE buffer. The dried gels were exposed to X-ray film at -70 °C with an intensifying screen.

**Transfection and Luciferase Assay.** Cells (293T cells) were transfected with 0.8  $\mu$ g pGL3-MGAT1 plasmid, 0.1  $\mu$ g expression vector plasmid, and 10 ng pRL-CMV (Promega), using Lipofectamine (Invitrogen), according to the manufacturer's instructions. After 24 h, the luciferase activities were measured using the Dual Luciferase Reporter Assay System (Promega), according to the manufacturer's instructions. Firefly luciferase activities were standardized to Renilla activities.

**Microarray Analysis.** DIO-prone C57BL/6 mice and DIO-resistant C3H/HeJ mouse strains were maintained on a CD and a HFD for 12 wk. A total RNA sample was prepared and the gene expression was analyzed by the Agilent Mouse Genome 4 $\times$ 44k oligo chip. Similarly, total RNA was prepared from Ad-PPAR $\gamma$ 2-injected mice and subjected to microarray analysis. The preparation of hybridization and the scanning of mouse chips were performed according to the manufacturer's protocols (Genocheck).

**TLC.** TLC was performed as previously described (5). Briefly, primary hepatocytes were labeled with 1  $\mu$ Ci/mL of [<sup>14</sup>C]glycerol

(ARC) in DMEM containing 5% (vol/vol) FBS, 1.5 mM glycerol, 100 units/mL penicillin, and 100  $\mu$ g/mL streptomycin at 37 °C in 5% (vol/vol) CO<sub>2</sub>. After 4 h, lipids were extracted twice with 1 mL of isopropanol:hexane (2:3) at room temperature for 30 min. Delipidated cells were digested with 1 N NaOH for protein extraction. Lipid extracts were dried under a N<sub>2</sub> stream and redissolved in 300  $\mu$ L of chloroform. Neutral lipid standards (Sigma) were applied (20  $\mu$ g) onto a 0.2-mm silica G plate (Macherey-Magel). The chromatograms were developed in hexane:diethyl ether:acetic acid (80:20:1) and exposed to iodine vapor, and the visualized bands indicating diacylglycerol (DAG) and TG were scraped into scintillation vials containing 5 mL of counting mixture.

**Chromatin Immunoprecipitation (ChIP) Assay.** Formaldehyde was used to cross-link the cells for 10 min. Cells or liver tissue were transferred and rinsed with PBS, lysed, and subjected to chromatin shearing by sonication. Lysate was washed and chromatin immunoprecipitations were performed using the ChIP Assay Kit (Upstate) according to the manufacturer's protocol with anti-acetyl-Histone H3 or anti-dimethyl-Histone H3 antibody (Millipore) or anti-PPAR $\gamma$  antibody (Santa Cruz). Input control or ChIP samples were used as a template in PCR, using the following primers to amplify the PPAR $\gamma$  or MGAT1 promoter. Primers were as follows: PPAR $\gamma$ 1 pair primers, 5'-GAAGTCACACTCTGACAGG-A-3', 5'-CTTGTCTGTCACACAGTCCCT-3'; PPAR $\gamma$ 2 pair primers, 5'-CCAAATACGTTTATCTGGTGTTTC-3', 5'-CGTTGTCTACATTGTCTCGC-3'; and MGAT1 pair primers, 5'-GCCAA-GAAGTTACAAATGGTGCCC-3', 5'-CTGTCTTTCCAGCCC-TTGAG-3'.

**Methylation Analysis.** Genomic DNA was purified with the Wizard genomic DNA purification kit (Promega). Methylation analysis was performed by bisulfite conversion of genomic DNA, using the MethylDetector kit (Zymo Research). The primer sequences to amplify the PPAR $\gamma$ 1 promoter region are sense 5'-TTTTA-GYGGTTGTGAGGAGTAAGG-3' and antisense 5'-TCAA-ATATAACTTC TCCTCAACCC-3'. The PCR product was cloned using the TOPO TA Cloning kit (Invitrogen).

1. Kim JW, Ahn YH (1998) CCAAT/enhancer binding protein regulates the promoter activity of the rat GLUT2 glucose transporter gene in liver cells. *Biochem J* 336:83-90.
2. Kim JW, Tang QQ, Li X, Lane MD (2007) Effect of phosphorylation and S-S bond-induced dimerization on DNA binding and transcriptional activation by C/EBPbeta. *Proc Natl Acad Sci USA* 104:1800-1804.
3. Lee MW, et al. (2010) Regulation of hepatic gluconeogenesis by an ER-bound transcription factor, CREBH. *Cell Metab* 11:331-339.

4. Park SK, et al. (2004) CCAAT/enhancer binding protein and nuclear factor-Y regulate adiponectin gene expression in adipose tissue. *Diabetes* 53:2757-2766.
5. Cortés VA, et al. (2009) Molecular mechanisms of hepatic steatosis and insulin resistance in the AGPAT2-deficient mouse model of congenital generalized lipodystrophy. *Cell Metab* 9:165-176.

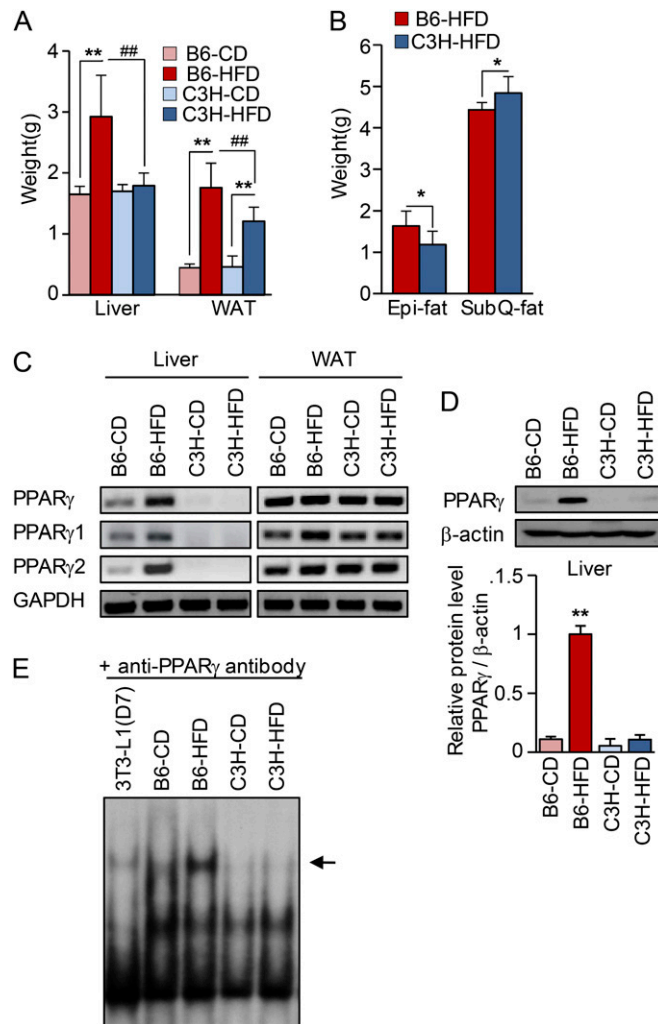

**Fig. S1.** Changes of liver and fat weight and hepatic PPAR $\gamma$  expression and its activity in B6 and C3H mice fed a CD or a HFD. (A) Liver and epididymal white adipose tissue (WAT) weight of B6 and C3H mice fed a CD or a HFD ( $n = 8$  and  $9$ , respectively). Data were analyzed by two-way ANOVA (\*\* $P < 0.01$  vs. CD-fed mice, respectively, ## $P < 0.01$  vs. B6-HFD). (B) Epididymal and s.c. fat weight of B6 and C3H mice fed a HFD ( $n = 8$  and  $9$ , respectively, \* $P < 0.05$ ). (C) RT-PCR analysis of PPAR $\gamma$ , PPAR $\gamma$ 1, and PPAR $\gamma$ 2 mRNA levels in liver and epididymal adipose tissue from B6 and C3H mice fed a CD or a HFD at 12 wk. (D) Western blot analysis of transcription factors in livers from B6 and C3H mice fed a CD or a HFD at 12 wk. (Lower) Densitometry results from two different mouse groups. Data represent the mean  $\pm$  SD. \*\* $P < 0.01$ . (E) EMSA experiment showing PPAR $\gamma$  binding activity using nuclear extracts prepared from B6 and C3H mice fed a CD or a HFD at 12 wk. Nuclear extract from differentiated 3T3-L1 adipocytes (day 7) was used as a positive control for PPAR $\gamma$  binding to PPRE on the CD36 promoter. The bands shifted by anti-PPAR $\gamma$  antibody (arrow) indicate the specific binding.







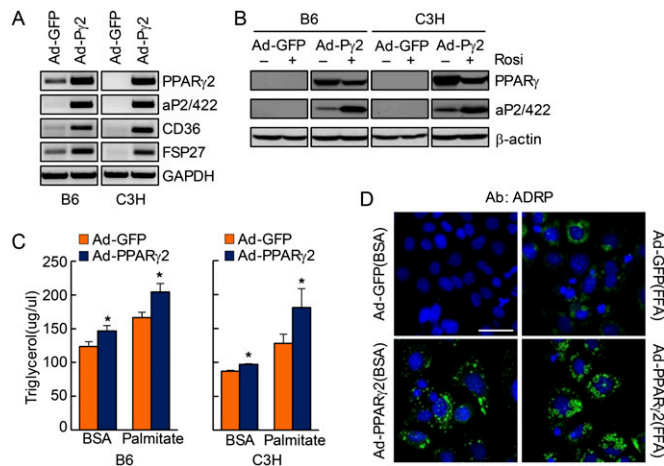

**Fig. 54.** Overexpression of PPAR $\gamma$  using primary hepatocytes isolated from B6 and C3H mice. Mouse primary hepatocytes were isolated from B6 and C3H mice and infected with 100 multiplicities of infection of either Ad-GFP or Ad-PPAR $\gamma$ 2. (A) RT-PCR analysis of PPAR $\gamma$ 2 and its target genes in the primary hepatocytes after 48 h of adenoviral infection. (B) Primary hepatocytes were infected with adenoviruses, and after 24 h, cells were treated with or without 1  $\mu$ M rosiglitazone for another 24 h. Equal amounts of total protein were prepared and analyzed by Western blot analysis for expression of PPAR $\gamma$ 2 and aP2/422. (C) After 36 h of infection, hepatocytes were incubated with or without palmitate (0.5 mM final concentration) in 1% FBS-DMEM for 24 h, and intracellular TG content was measured (\* $P$  < 0.05 compared with GFP). Data represent the mean  $\pm$  SD. (D) After 36 h of infection, hepatocytes were incubated with or without palmitate (0.5 mM final concentration) in 1% FBS-DMEM for 24 h. Hepatocytes were then fixed in MeOH/acetone and incubated with rabbit anti-ADRP for 2 h at room temperature. After three washes in PBS, cells were incubated for 1 h with FITC-conjugated anti-rabbit. Images of cells were generated by confocal laser microscopy. (Scale bar, 50  $\mu$ m).

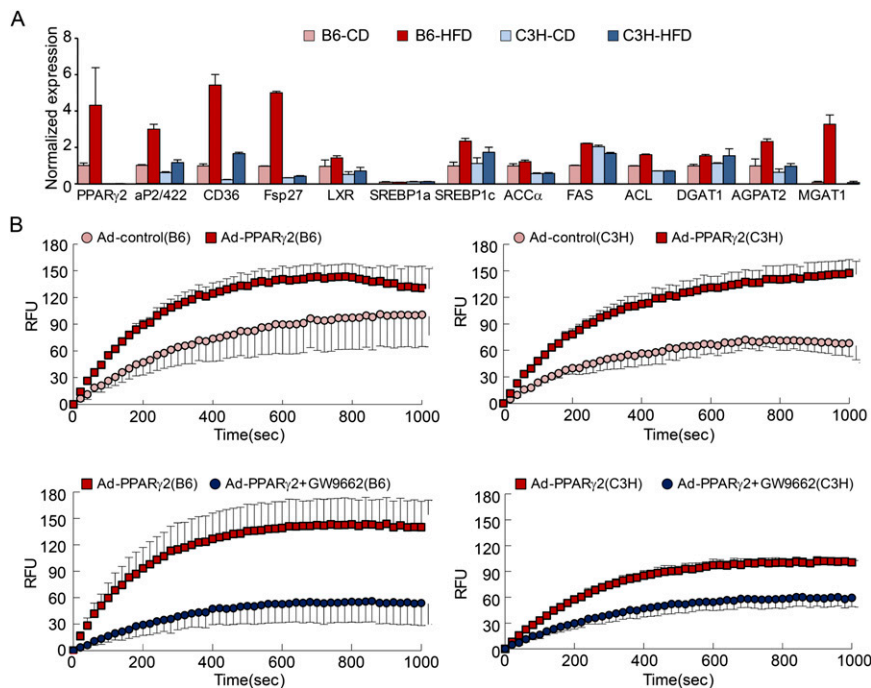

**Fig. 55.** Effect of PPAR $\gamma$  on fatty acid transport and TG accumulation by the regulation of target genes. (A) Real-time Q-PCR analysis showing hepatic gene expression involved in lipid metabolism in B6 and C3H mice fed a CD or a HFD ( $n$  = 3–4). (B) Fatty acid uptake was measured with a QBT Fatty Acid Uptake Assay kit, using primary hepatocytes isolated from B6 and C3H mice. Hepatocytes were plated on 96-well plates and real-time quantification of fatty acid uptake using a fluorescence assay was carried out after 48 h. (Lower) GW9662 (10  $\mu$ M), a specific PPAR $\gamma$  inhibitor, was used. Data in A and B represent the mean  $\pm$  SD.



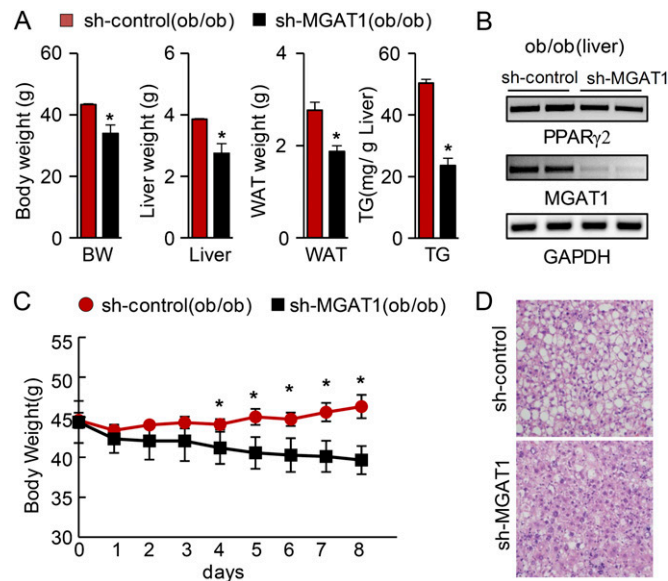

**Fig. S7.** Knockdown of MGAT1 improves hepatic steatosis in *ob/ob* mice. Leptin-deficient obese (*ob/ob*) mice were injected with either Ad-US or Ad-sh-MGAT1 virus via tail veins. After 1 wk, the mice were killed and then assays were performed. (A) Body weight, liver weights, epididymal fat weights, and hepatic TG contents were determined. Data represent the mean  $\pm$  SD;  $n = 3/3$ . \* $P < 0.05$ . (B) RT-PCR analysis showing efficient knockdown of MGAT1 in livers from *ob/ob* mice. (C) Body weight changes were measured from the day of viral injection (day 0). \* $P < 0.05$ . (D) H&E staining of liver sections from *ob/ob* mice treated with Ad-US or Ad-sh-MGAT1.

**Table S1. Biochemical parameters of C57BL/6J and C3H/HeJ mice fed with chow diet and high-fat diet**

| Parameter         | Chow diet |         |          |                | High-fat diet |         |          |                |
|-------------------|-----------|---------|----------|----------------|---------------|---------|----------|----------------|
|                   | C57BL/6J  | C3H/HeJ | <i>n</i> | <i>P</i> value | C57BL/6J      | C3H/HeJ | <i>n</i> | <i>P</i> value |
| Triglyceride      | 60.33     | 95.67   | 8        | 0.0002         | 34.00         | 40.67   | 8        | 0.2198         |
| Total cholesterol | 71.67     | 92.67   | 8        | 0.0004         | 160.33        | 163.00  | 8        | 0.4337         |
| HDL cholesterol   | 52.33     | 53.00   | 8        | 0.3838         | 72.00         | 89.00   | 8        | 0.0044         |
| LDL cholesterol   | 4.00      | 5.33    | 8        | 0.0081         | 17.33         | 7.00    | 8        | 0.0057         |
| AST               | 35.67     | 69.67   | 8        | 0.1072         | 74.33         | 83.67   | 8        | 0.3795         |
| ALT               | 26.33     | 45.67   | 8        | 0.1502         | 81.67         | 80.00   | 8        | 0.4792         |

ALT, alanine aminotransferase; AST, aspartate aminotransferase; HDL, high-density lipoprotein; LDL, low-density lipoprotein. The mice were subjected to 4 h of fasting before being killed.



**Table S2. Microarray of differential gene expression profile in livers of B6 and C3H mice**

| Gene                                                   | GenBank<br>accession no. | Fold   |      |                            |       |
|--------------------------------------------------------|--------------------------|--------|------|----------------------------|-------|
|                                                        |                          | HFD/CD |      | Ad-PPAR $\alpha$ 2/<br>GFP |       |
|                                                        |                          | B6     | C3H  | B6                         | C3H   |
| <b>Fatty acid synthesis</b>                            |                          |        |      |                            |       |
| Acetyl-CoA carboxylase $\alpha$                        | NM_133360                | 1.06   | 0.70 | 2.52                       | 1.93  |
| Acetyl-CoA carboxylase $\beta$                         | NM_133904                | 1.23   | 1.14 | 1.73                       | 1.86  |
| ATP citrate lyase                                      | NM_134037                | 0.29   | 1.04 | 1.10                       | 1.13  |
| ELOVL family member 6                                  | NM_130450                | 1.97   | 0.64 | 2.00                       | 1.83  |
| Fatty acid synthase                                    | NM_007988                | 1.31   | 0.58 | 1.67                       | 2.38  |
| Malic enzyme                                           | NM_008615                | 1.15   | 0.77 | 3.55                       | 1.92  |
| Stearoyl-CoA desaturase 1                              | NM_009127                | 0.39   | 1.09 | 1.16                       | 1.57  |
| Stearoyl-CoA desaturase 2                              | NM_009128                | 1.05   | 1.37 | 0.65                       | 1.68  |
| <b>TG metabolism</b>                                   |                          |        |      |                            |       |
| 1-Acylglycerol-3-phosphate <i>O</i> -acyltransferase 1 | NM_018862                | 0.91   | 1.44 | 2.02                       | 1.45  |
| 1-Acylglycerol-3-phosphate <i>O</i> -acyltransferase 2 | NM_026212                | 1.87   | 1.23 | 1.61                       | 1.30  |
| 1-Acylglycerol-3-phosphate <i>O</i> -acyltransferase 3 | NM_053014                | 1.06   | 0.99 | 1.15                       | 1.13  |
| 1-Acylglycerol-3-phosphate <i>O</i> -acyltransferase 6 | NM_018743                | 2.38   | 0.87 | 1.80                       | 1.19  |
| Diacylglycerol <i>O</i> -acyltransferase 1             | NM_010046                | 1.62   | 0.84 | 4.15                       | 2.47  |
| Diacylglycerol <i>O</i> -acyltransferase 2             | NM_026384                | 0.97   | 1.28 | 1.19                       | 1.08  |
| Glycerol-3-phosphate acyltransferase                   | NM_008149                | 5.50   | 0.75 | 1.45                       | 1.59  |
| Monoacylglycerol <i>O</i> -acyltransferase 1           | NM_026713                | 2.48   | —    | 4.19                       | 5.22  |
| Monoacylglycerol <i>O</i> -acyltransferase 2           | NM_177448                | 0.99   | 1.05 | 0.93                       | 0.71  |
| Phosphatidic acid phosphatase 2a (LPP1)                | NM_008903                | 0.59   | 1.20 | —                          | —     |
| Phosphatidic acid phosphatase 2a (LPP1)                | NM_008247                | —      | —    | 0.99                       | 1.29  |
| Phosphatidic acid phosphatase type 2B (LPP3)           | NM_080555                | 0.96   | 1.36 | 1.54                       | 1.12  |
| Phosphatidic acid phosphatase type 2c (LPP2)           | NM_015817                | 2.35   | 0.97 | 0.81                       | 1.27  |
| <b>Transport protein</b>                               |                          |        |      |                            |       |
| Adipose differentiation-related protein                | NM_007408                | 1.74   | 1.48 | 1.96                       | 1.71  |
| Apolipoprotein B                                       | AK147540                 | 0.48   | 0.88 | 0.88                       | 0.93  |
| CD36 antigen                                           | NM_007643                | 2.71   | 0.98 | 2.57                       | 7.97  |
| CD68 antigen                                           | NM_009853                | 1.76   | 0.86 | 0.53                       | 0.67  |
| Cell death-inducing DFFA-like effector c               | NM_178373                | 13.0   | 7.36 | 19.15                      | 12.16 |
| Fatty acid-binding protein 1, liver                    | NM_017399                | 1.12   | 1.02 | 1.23                       | 1.08  |
| Fatty acid-binding protein 2, intestinal               | NM_007980                | 1.72   | 2.13 | 1.76                       | 1.72  |
| Fatty acid-binding protein 3, muscle and heart         | NM_010174                | 4.23   | 1.11 | 1.83                       | 1.00  |
| Fatty acid-binding protein 4, adipocyte                | NM_024406                | 2.36   | 3.38 | 20.48                      | 26.37 |
| Fatty acid-binding protein 5, epidermal                | NM_010634                | —      | 0.27 | 2.24                       | 2.13  |
| Fatty acid-binding protein 7, brain                    | NM_021272                | 1.08   | 0.91 | 0.58                       | 0.75  |
| Fatty acid-binding protein 9, testis                   | NM_011598                | 0.73   | 0.64 | 1.17                       | 0.73  |
| Fatty acid transporter, member 1                       | NM_011977                | 1.26   | 0.78 | 0.97                       | 0.99  |
| Fatty acid transporter, member 2                       | NM_011978                | 1.13   | 0.89 | 1.14                       | 1.04  |
| Fatty acid transporter, member 4                       | NM_011989                | 1.66   | 0.98 | 2.84                       | 1.75  |
| Fatty acid transporter, member 5                       | NM_009512                | 0.84   | 1.13 | 0.52                       | 0.79  |
| Perilipin                                              | NM_175640                | 0.52   | 1.01 | 1.11                       | 0.90  |
| Facilitated glucose transporter, member 4              | NM_009204                | 3.65   | 1.21 | 1.31                       | 0.54  |
| Transporter 1, ATP-binding cassette                    | NM_013683                | 3.90   | 1.08 | 0.97                       | 0.75  |

—, undetermined.
